# Supplementary material for: Presence and Distribution of Sun-Blocking Agents in the Danube River: Implications for Aquatic Ecosystem Health
Source: MDPI journal article supplement (doi:10.3390/w16070945), 2024-03-25
Supplement: s1 [file s1]

# Occurrence and Distribution of sun-blocking agents in the Danube River: Implications for Aquatic Ecosystem Health

Florinela Pirvu<sup>†</sup>, Iuliana Paun<sup>†</sup>, Ioana Antonia Cimpean, Luoana Florentina Pascu\*, Florentina Laura Chiriac\*

**Table S1. Physico-chemical properties**

| Compound                                   | Abrev.   | Molecular Formula                              | Molecular weight | Solub. <sup>a,b</sup> | Log Kow <sup>b</sup> | Log Koc <sup>b</sup> | BCF <sup>b,c</sup> | Chemical structure                                                                    |
|--------------------------------------------|----------|------------------------------------------------|------------------|-----------------------|----------------------|----------------------|--------------------|---------------------------------------------------------------------------------------|
| 4-hydroxybenzophenone                      | 4HBP     | C <sub>13</sub> H <sub>10</sub> O <sub>2</sub> | 198.2            | 405.8                 | 3.07                 | 3.24                 | 6.67               | 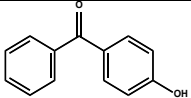   |
| 2,4-dihydroxybenzophenone                  | BP-1     | C <sub>13</sub> H <sub>10</sub> O <sub>3</sub> | 214.2            | 413.4                 | 2.96                 | 3.46                 | 5.52               |    |
| 2,3,4-trihydroxybenzophenone               | 2,3,4HBP | C <sub>13</sub> H <sub>10</sub> O <sub>4</sub> | 230.2            | 381.1                 | 2.91                 | 3.68                 | 4.98               |    |
| 2,2',4,4'-tetrahydroxybenzophenone         | BP-2     | C <sub>13</sub> H <sub>10</sub> O <sub>5</sub> | 246.2            | 398.5                 | 3.16                 | 3.88                 | 3.99               |    |
| 2-hydroxy-4-methoxy-benzophenone           | BP-3     | C <sub>14</sub> H <sub>12</sub> O <sub>3</sub> | 228.2            | 68.56                 | 3.52                 | 3.10                 | 23.9               |    |
| 2,2'-dihydroxy-4-methoxy-benzophenone      | BP-8     | C <sub>14</sub> H <sub>12</sub> O <sub>4</sub> | 244.2            | 52.37                 | 4.31                 | 3.32                 | 25.3               |    |
| 2-hydroxy-4-methoxy-4'-methyl-benzophenone | BP-10    | C <sub>15</sub> H <sub>14</sub> O <sub>3</sub> | 242.2            | 33.3                  | 4.07                 | 3.31                 | 39.4               |   |
| Homosalate                                 | HS       | C <sub>16</sub> H <sub>22</sub> O <sub>3</sub> | 262.3            | 0.42                  | 6.16                 | 4.03                 | 11080              |  |
| Ethylhexyl salicylate                      | ES       | C <sub>15</sub> H <sub>22</sub> O <sub>3</sub> | 250.3            | 24.6                  | 5.97                 | 3.71                 | 416.7              |  |
| Benzyl salicylate                          | BS       | C <sub>14</sub> H <sub>12</sub> O <sub>3</sub> | 228.2            | 0.72                  | 4.31                 | 3.93                 | 7856               |  |

<sup>a</sup>Solub.: solubility (mg/L) in water at 25°C. <sup>b</sup>log Kow (octanol–water partition coefficient) and log Koc (soil organic carbon–water partitioning coefficient) was obtained by the Estimation Programs Interface (EPI) Suite developed by the US EPA and Syracuse Research Corp. <sup>c</sup>BCF: bioconcentration factor (L/kg wet weight).

**Table S2.** Adsorption Classifications (Estimating Physical/Chemical and Environmental Fate Properties with EPI Suite™. Sustainable Futures/Pollution Prevention (P2) Framework Manual. EPA-748-B12-001. U.S. Environmental Protection Agency, OCSPP)

| Log K <sub>oc</sub> | Adsorption Classifications                                                       |
|---------------------|----------------------------------------------------------------------------------|
| > 4.5               | Very strong sorption to soil / sediment, negligible migration to ground water    |
| 3.5 - 4.4           | Strong sorption to soil / sediment, negligible to slow migration to ground water |
| 2.5 - 3.4           | Moderate sorption to soil / sediment, slow migration to ground water             |
| 1.5 - 2.4           | Low sorption to soil / sediment, moderate migration to ground water              |
| < 1.5               | Negligible sorption to soil / sediment, rapid migration to ground water          |

**Table S3.** The LC-MS/MS parameters for the 10 UV filters and mass-labelled standard detection and quantification.

| Analyte             | Retention time (min) | Precursor Ion | Product Ion | Fragmentor Voltage (V) | Collision Energy (V) | Cell Accelerator Voltage (V) | Dwell time (msec) | ESI mode | Drying gas flow (L/min) | Drying gas temperature (°C) | Nebulizer pressure (psi) | Capillary voltage (V) |
|---------------------|----------------------|---------------|-------------|------------------------|----------------------|------------------------------|-------------------|----------|-------------------------|-----------------------------|--------------------------|-----------------------|
| BP-2                | 2.65                 | 245           | 91.0        | 110                    | 30                   | 5                            | 250               | Negative |                         |                             |                          |                       |
| 234HBP              | 3.26                 | 229           | 151         | 135                    | 25                   | 0                            | 250               | Negative |                         |                             |                          |                       |
| 4HBP                | 3.72                 | 197           | 92.0        | 150                    | 45                   | 5                            | 250               | Negative |                         |                             |                          |                       |
| BP-1                | 4.68                 | 213           | 135         | 130                    | 20                   | 4                            | 250               | Negative |                         |                             |                          |                       |
| BP-8                | 5.97                 | 245           | 121         | 150                    | 20                   | 5                            | 250               | Pozitive |                         |                             |                          |                       |
| BP- <sup>13</sup> C | 7.27                 | 184           | 106         | 100                    | 15                   | 5                            | 250               | Pozitive | 8                       | 300                         | 40                       | 5000                  |
| BP-3                | 8.12                 | 229           | 151         | 135                    | 20                   | 1                            | 250               | Pozitive |                         |                             |                          |                       |
| BP-10               | 8.91                 | 243           | 151         | 130                    | 20                   | 2                            | 100               | Pozitive |                         |                             |                          |                       |
| BS                  | 8.94                 | 229           | 211         | 115                    | 15                   | 3                            | 300               | Pozitive |                         |                             |                          |                       |
| ES                  | 12.75                | 251           | 139         | 90                     | 4                    | 5                            | 300               | Pozitive |                         |                             |                          |                       |
| HS                  | 13.10                | 263           | 139         | 90                     | 5                    | 5                            | 300               | Pozitive |                         |                             |                          |                       |

**Table S4.** Quantitation and confirmation information of analytes in surface water

| Compound | R <sup>2</sup> | Accuracy (%) | Recovery in sample (%) | LOD (ng/L) | LOQ (ng/L) | Matrix effect |
|----------|----------------|--------------|------------------------|------------|------------|---------------|
| BP-2     | 0.998          | 97.3         | 89.1                   | 0.14       | 0.40       | 93.1          |
| 234THBP  | 0.999          | 98.4         | 86.4                   | 0.10       | 0.28       | 90.4          |
| 4HBP     | 0.998          | 101.6        | 94.1                   | 0.15       | 0.43       | 95.6          |
| BP-1     | 0.998          | 99.5         | 103.2                  | 0.13       | 0.36       | 100.9         |
| BP-8     | 0.999          | 104.5        | 91.6                   | 0.04       | 0.10       | 95.1          |
| BP-3     | 1.002          | 106.1        | 110.4                  | 0.13       | 0.37       | 106.5         |
| BP-10    | 0.999          | 101.4        | 92.2                   | 0.13       | 0.35       | 95.2          |
| BS       | 0.998          | 99.2         | 93.9                   | 0.22       | 0.61       | 94.3          |
| HS       | 0.998          | 98.5         | 105.4                  | 0.25       | 0.69       | 100.1         |
| ES       | 1.000          | 97.8         | 89.3                   | 0.19       | 0.54       | 96.6          |

**Table S5.** Quantitation and confirmation information of analytes in sediment

| Compound | R <sup>2</sup> | Accuracy (%) | Recovery in sample (%) | LOD (ng/g d.w.) | LOQ (ng/g d.w.) | Matrix effect |
|----------|----------------|--------------|------------------------|-----------------|-----------------|---------------|
| BP-2     | 0.993          | 96.8         | 86.1                   | 0.18            | 0.50            | 87.2          |
| 234THBP  | 0.997          | 94.6         | 83.7                   | 0.13            | 0.36            | 87.7          |
| 4HBP     | 0.998          | 102.3        | 90.6                   | 0.19            | 0.53            | 92.1          |
| BP-1     | 0.997          | 98.2         | 105.2                  | 0.18            | 0.49            | 102.4         |
| BP-8     | 0.999          | 97.7         | 87.4                   | 0.08            | 0.21            | 90.7          |
| BP-3     | 1.002          | 93.9         | 112.5                  | 0.16            | 0.45            | 108.2         |
| BP-10    | 0.996          | 94.6         | 88.6                   | 0.19            | 0.54            | 91.6          |
| BS       | 0.998          | 97.9         | 90.4                   | 0.28            | 0.79            | 92.8          |
| HS       | 0.994          | 102.4        | 107.3                  | 1.21            | 3.39            | 103.2         |
| ES       | 1.000          | 98.9         | 86.5                   | 0.75            | 2.10            | 93.1          |

**Table S6.** Concentration levels (ng/L) of the 10 UV filters in surface water samples

| Analyte | SW S1      | SW S2 | SW S3 | SW S4 | SW S5 |
|---------|------------|-------|-------|-------|-------|
|         | Conc (n=3) |       |       |       |       |
| BP-2    | ND         | ND    | ND    | ND    | ND    |
| 234HBP  | 16.2       | 80.0  | 41.0  | 22.4  | 5.0   |
| 4HBP    | <LOQ       | <LOQ  | <LOQ  | <LOQ  | <LOQ  |
| BP-1    | 2.4        | 39.3  | 88.6  | 10.9  | 0.3   |
| BP-8    | 0.3        | ND    | 0.3   | ND    | ND    |
| BP-3    | 558        | 1009  | 1919  | 2136  | 2224  |
| BP-10   | 0.7        | <LOQ  | 0.6   | <LOQ  | <LOQ  |
| BS      | ND         | 31.6  | ND    | ND    | 43.5  |
| HS      | ND         | ND    | ND    | ND    | ND    |
| ES      | ND         | ND    | ND    | ND    | ND    |

**Table S7.** Concentration levels (ng/g s.u.) of the 10 UV filters in sediment samples

| Analyte    | Sed S1 | Sed S2 | Sed S3 | Sed S4 | Sed S5 |
|------------|--------|--------|--------|--------|--------|
| Conc (n=3) |        |        |        |        |        |
| BP-2       | 4.5    | ND     | ND     | ND     | ND     |
| 234HBP     | 16.7   | 41.7   | ND     | ND     | ND     |
| 4HBP       | 2.2    | 2.5    | 3.4    | 3.0    | 3.9    |
| BP-1       | 6.2    | 2.4    | 2.5    | 2.0    | 3.3    |
| BP-8       | ND     | ND     | ND     | ND     | ND     |
| BP-3       | 51.5   | 66.2   | 86.4   | 100.1  | 128.6  |
| BP-10      | 0.8    | <LOQ   | 1.2    | 2.2    | <LOQ   |
| BS         | 79.4   | 102.1  | 136.1  | 200.4  | 244.0  |
| HS         | ND     | ND     | ND     | ND     | ND     |
| ES         | ND     | ND     | ND     | ND     | ND     |

**Table S8.** The total amount of UVFs and TOC concentration levels

| Sampling points | SW                     |            | SED                   |             |
|-----------------|------------------------|------------|-----------------------|-------------|
|                 | $\Sigma_{UVFs}$ (ng/L) | TOC (mg/L) | $\Sigma_{UVF}$ (ng/g) | TOC (mg/Kg) |
| S1              | 578                    | 2.8        | 161                   | 157         |
| S2              | 1161                   | 2.4        | 215                   | 79          |
| S3              | 2050                   | 2.7        | 230                   | 212         |
| S4              | 2170                   | 3.6        | 308                   | 36          |
| S5              | 2273                   | 3.8        | 380                   | 118         |

**Table S9.** Pearson correlation calculated between UVFs and TOC amount

| Analytes |               | SW (n=5) | SED (n=5) |
|----------|---------------|----------|-----------|
| 234THBP  | Pearson Corr. | -0.700   | -0.112    |
|          | p value       | 0.188    | 0.858     |
| 4HBP     | Pearson Corr. | 0.154    | 0.100     |
|          | p value       | 0.805    | 0.873     |
| BP-1     | Pearson Corr. | -0.600   | 0.700     |
|          | p value       | 0.285    | 0.188     |
| BP-8     | Pearson Corr. | -0.224   | -         |
|          | p value       | 0.718    | -         |
| BP-3     | Pearson Corr. | 0.600    | -0.300    |
|          | p value       | 0.285    | 0.624     |
| BP-10    | Pearson Corr. | -0.600   | -0.100    |
|          | p value       | 0.116    | 0.873     |
| BS       | Pearson Corr. | -0.112   | -0.300    |
|          | p value       | 0.858    | 0.624     |
